# Supplementary material
Source: ML conference proceedings conference paper supplement (https://openaccess.thecvf.com/content/CVPR2026/html/Kumar_InstAP_Instance-Aware_Vision-Language_CVPR_2026_paper.html)

# InstAP: Instance-Aware Vision-Language Pre-Train for Spatial-Temporal Understanding

## Supplementary Material

### 7. Experiment Details

**Hardware and Infrastructure.** All training experiments are executed on a dedicated high-performance compute cluster. The infrastructure allocation is divided by training stage to optimize for computational demands:

- **Self-Supervised Masked Video Modeling:** Executed on 320 NVIDIA H100 GPUs (80 GB VRAM per GPU).
- **Instance-aware Alignment Learning:** Executed on 200 NVIDIA B200 GPUs (180 GB VRAM per GPU), allowing for efficient processing of larger frame samples.

We adopt PyTorch Distributed Data Parallel for multi-node training, as the entire model fits in a single GPU and thus data-parallel scaling is sufficient.

**Training Configurations.** For the initial self-supervised masked video modeling, we train for 800 epochs using an 80% masking ratio on 8-frame clips. The detailed hyperparameters for this stage are listed in Table 7. For the subsequent instance-aware alignment, we initialize from the best previous stage checkpoint and train for 15 epochs. In this stage, we increase temporal resolution to sample 16 frames per video. The joint optimization of global and instance-level alignment losses uses the hyperparameters detailed in Table 8.

**Baseline Configurations.** We evaluate state-of-the-art video-text models using their official checkpoints, inference code, and hyperparameters. Coca [64], ViCLIP [54], OpenCLIP [11], and UMT-L [29] use ViT-L backbones, while VideoPrism [70], CLIP4Clip [38], CLIP-ViP [60], SigLIP (ViT-B) [68], and MCQ [17] use ViT-B backbones. For UMT-L, we use the officially released  $L$  variant trained on the authors' 25-million image/video-text corpus, and train UMT-L (InstVL;  $g$ ) and UMT-L (InstVL;  $g+i$ ) on the same corpus as InstAP.

**Dataset Curation.** We use the following diverse specialized prompts to facilitate instance/global caption generation for images and videos:

```
image_caption_prompt: "You are a powerful image captioner. Create a detailed caption describing the image. Include the object types and color, object actions, precise object locations. Do not describe the contents in list form. Minimize aesthetic descriptions as much as possible. Do not repeat the same information in the caption. You must only describe the image."
```

```
image_instance_caption_prompt: "You are a powerful bounding box captioner. Create detailed caption describing the contents of the red colored bounding box in the image."
```

```
Include the object types and color, object actions, precise object locations. If there is person in bounding box then include the person actions, expressions, precise person and object locations, etc. Instead of describing the imaginary content, only describe the content one can determine confidently from the bounding box. Do not describe the contents in list form. Minimize aesthetic descriptions as much as possible. Do not repeat same information in the caption. You must only describe about the content of bounding box, nothing else."
```

```
video_frame_caption_prompt: "You are an excellent video frame analyst. Utilizing your incredible attention to detail, you provide clear and detailed descriptions of a video frame. You excel in identifying and conveying actions, behaviors, environment, states and attributes of all the objects in image. ## Skills #### Skill 1: Describing Object Actions and Behaviors - Describe the action or behavior of objects within the image. #### Skill 2: Describing Environment and Background Variations - Elaborate on environment #### Skill 3: Describing Object Appearances - Describe the appearance of objects within the current frame. Do not repeat the information already included in previously. Do not describe the contents by itemizing them in list form. State facts objectively without using any rhetorical devices such as metaphors or personification. Descriptions should be fluent and precise, avoiding analyzing and waxing lyrical. Descriptions need to be concise, describing only the information that can be determined, without analysis or speculation. Do not mention the frame number and timestamp of the current frame. You must generate the caption in one paragraph. Here is the frame:"
```

```
video_frame_caption_merge_prompt: "You are an expert in generating a single detailed summary. ## Skills: Summarize sequentially, maintaining coherence between frames and the integrity of the timeline. Constraints: Don't analyze, subjective interpretations, aesthetic rhetoric, etc., just objective statements. - Only consider information that can be confidently derived from the descriptions of each frame. - Do not extrapolate or imagine, remove uncertain information. - No mention of specific frames index or timestamps. You are given a chronological sequence of captions for a sequence of frames. Generate a single detailed chronological caption for the video with the help the captions provided. The following are the captions for each frame in a video:"
```

```
video_instance_caption_prompt: "You are a powerful bounding box captioner. Create detailed caption describing the contents of the red colored bounding box in the image. Include the object types and color, object actions, precise object locations. If there is person in bounding box then include the person actions, expressions, precise person and object locations, etc. Instead of describing the imaginary content, only describe the content one can determine confidently from the bounding box. Do not describe the contents by itemizing them in list form. Minimize aesthetic descriptions as much as possible. Do not repeat same information in the caption. You must only describe about the content of bounding box."
```

To synthesize comprehensive video descriptions, we first utilize *video\_frame\_caption\_prompt* to generate a caption for each sampled frame. Subsequently, these frame level descriptions are aggregated into a unified whole video caption using *video\_frame\_caption\_merge\_prompt*.

**Dataset Filtering.** For each instance, we compute CLIP similarity between its bbox crop (*crop*) and the first caption sentence (*sent1*); keep the instance iff  $\max(s_{crop}, s_{sent1}) \geq$

$\tau$  ( $\tau = 0.15$ ; minimum size of bounding boxes must be  $\geq 50 \times 50$ ). For a video to be included in the final dataset, it must have at least one instance with CLIP score  $\geq \tau$ .

**Qualitative Error Analysis.** In Table 6, we report human-in-the-loop audit results for caption quality. We evaluate 1K video captions and 1K image captions following [10] on three aspects: **Omission (O)**, **Fabrication (F)**, and **Distortion (D)**.  $O/F/D \in [0, 1]$  are normalized scores, where higher is better, and  $S \in [0, 3]$  denotes the aggregate score.

Table 6. Caption quality audit ( $S=O+F+D$ ; higher is better)

| Split | Global |      |      |      | Instance |      |      |      |
|-------|--------|------|------|------|----------|------|------|------|
|       | O      | F    | D    | S    | O        | F    | D    | S    |
| Video | 0.93   | 0.47 | 1.00 | 2.40 | 0.87     | 0.33 | 1.00 | 2.20 |
| Image | 1.00   | 0.53 | 1.00 | 2.53 | 1.00     | 0.67 | 1.00 | 2.67 |

Table 7. Hyperparameters used for self-supervised masked video modeling, as presented in Sec. 4.1.

| Hyperparameter | Value                                      |
|----------------|--------------------------------------------|
| Optimizer      | AdamW ( $\beta_1 = 0.9, \beta_2 = 0.999$ ) |
| Learning rate  | $1.5 \times 10^{-4}$                       |
| Batch size     | 64                                         |
| Total epochs   | 800                                        |
| Warmup epochs  | 40                                         |
| Input frames   | 8                                          |

Table 8. Hyperparameters used for global and instance alignment learning, as presented in Sec. 4.2.

| Hyperparameter               | Value                                      |
|------------------------------|--------------------------------------------|
| Optimizer                    | AdamW ( $\beta_1 = 0.9, \beta_2 = 0.999$ ) |
| Learning rate                | $1 \times 10^{-4}$                         |
| Batch size                   | 64                                         |
| Total epochs                 | 15                                         |
| Warmup epochs                | 1                                          |
| Drop-path rate               | 0.2                                        |
| Input frames                 | 16                                         |
| Image size (Student/Teacher) | 224/196                                    |
| Patch size (Student/Teacher) | 16/14                                      |

## 8. Extended Evaluation on InstVL (img-zero)

In Table 9, we provide a comprehensive evaluation including R@1, R@5, and R@10 metrics across both 1K and 10K candidate splits for the InstVL (img-zero) benchmark. To ensure clarity and focus on the most competitive approaches, we omit lower-performing baselines such as Coca [64] and CLIP-ViP [60] from this detailed comparison.

The extended metrics on the *instance* split reveal that InstAP consistently outperforms prior methods across the retrieval ranking. On the challenging instance split with 1K candidates, InstAP achieves a V2T R@10 of 78.19%, surpassing the strongest baseline, UMT-L (InstVL; g+i), by nearly 7.4 percentage points. This indicates that even when the exact ground truth is not the top prediction, InstAP places it within the immediate semantic neighborhood far more reliably than global-only models.

When the candidate pool increases to 10K, the difficulty of the retrieval task scales significantly. Notably, our method demonstrates higher resilience to this expanded search space. In the 10K instance split, InstAP outperforms UMT-L (InstVL; g+i) by 9.05 percentage points in V2T R@1 (31.87% vs. 22.82%). This suggests that our instance-aware alignment creates a more discriminative feature space that resists degradation better than global averaging when faced with a larger number of semantic distractors.

Finally, while our primary objective is fine-grained instance alignment, the results on the global split confirm that this does not come at the cost of general scene understanding. InstAP achieves comparable or superior performance to the strongest baselines on the global metrics, with only marginal gaps on a few R@10 scores, confirming that our joint training objective successfully injects local granularity without compromising the model’s holistic representation capabilities.

## 9. Analysis of Baseline Limitations

To further understand the impact of our instance-aware alignment strategies, we present more qualitative analysis of failure cases exhibited by the global-only baseline [29]. We examine retrieval results on both fine-grained instance retrieval (InstVL-1K (img-zero)) and global video retrieval (MSR-VTT [58]).

**Instance Retrieval.** In the instance retrieval task, the model must align a cropped/instance-aware image query with a specific caption. As shown in Fig. 6, the baseline frequently suffers from semantic confusion. Because the baseline relies solely on global scene statistics, it retrieves captions that match the general “vibe” or texture of the image but fail to align with the specific object in the crop. For example, when querying a specific stack of books, the baseline retrieves a caption describing a “wooden chest” in a similar room setting. Similarly, for a query of a specific person, the baseline retrieves a generic description of a woman with similar hair color (“dark hair”), ignoring the specific identity or context. In contrast, InstAP correctly distinguishes these fine-grained details.

Table 9. Results on InstVL (img-zero). We report T2V/V2T R@1, R@5, and R@10 on the *instance* and *global* splits for 1K and 10K candidates. Best results in each column are highlighted in bold.

| Method                   | Split    | InstVL(img-zero) |              |              |              |              |              |              |              |              |              |              |              |
|--------------------------|----------|------------------|--------------|--------------|--------------|--------------|--------------|--------------|--------------|--------------|--------------|--------------|--------------|
|                          |          | 1K               |              |              |              |              |              | 10K          |              |              |              |              |              |
|                          |          | T2V              |              |              | V2T          |              |              | T2V          |              |              | V2T          |              |              |
|                          |          | R@1              | R@5          | R@10         | R@1          | R@5          | R@10         | R@1          | R@5          | R@10         | R@1          | R@5          | R@10         |
| VideoPrism [70]          | Instance | 21.32            | 50.23        | 58.37        | 27.39        | 56.65        | 63.89        | 13.85        | 35.22        | 42.65        | 20.04        | 42.00        | 49.21        |
|                          | Global   | 85.70            | 89.70        | <b>90.60</b> | 85.80        | 90.20        | <b>90.80</b> | 73.05        | 85.32        | 87.34        | 75.11        | 86.18        | 88.01        |
| CLIP4Clip [38]           | Instance | 17.82            | 42.57        | 49.84        | 25.10        | 53.74        | 61.44        | 9.11         | 24.96        | 31.98        | 16.30        | 35.77        | 42.79        |
|                          | Global   | 78.20            | 87.60        | 89.10        | 81.70        | 89.30        | 90.00        | 56.95        | 76.25        | 80.96        | 63.96        | 80.25        | 84.20        |
| ViCLIP [54]              | Instance | 18.25            | 37.28        | 43.81        | 20.93        | 40.97        | 47.51        | 9.57         | 21.84        | 27.19        | 11.21        | 23.65        | 29.20        |
|                          | Global   | 77.80            | 88.30        | 89.30        | 77.60        | 87.80        | 89.10        | 58.51        | 76.08        | 80.58        | 58.21        | 76.02        | 80.56        |
| OpenCLIP [11]            | Instance | 26.73            | 48.13        | 55.25        | 36.19        | 61.40        | 66.73        | 17.28        | 34.53        | 40.29        | 25.57        | 46.39        | 52.05        |
|                          | Global   | 83.40            | 88.70        | 89.20        | 86.90        | 90.00        | 90.20        | 70.75        | 82.17        | 84.62        | 78.13        | 86.47        | 87.84        |
| SigLIP [68]              | Instance | 28.25            | 50.08        | 57.35        | 35.56        | 60.93        | 65.72        | 16.98        | 34.06        | 39.91        | 25.19        | 45.14        | 50.83        |
|                          | Global   | 83.90            | 88.90        | 89.60        | 86.50        | 90.10        | 90.40        | 68.64        | 81.90        | 84.87        | 75.66        | 86.11        | 87.96        |
| MCQ [17]                 | Instance | 17.08            | 37.74        | 46.69        | 19.61        | 42.22        | 50.39        | 7.04         | 17.81        | 23.72        | 8.55         | 21.07        | 27.54        |
|                          | Global   | 58.90            | 79.30        | 83.60        | 62.70        | 81.70        | 85.80        | 34.13        | 55.88        | 64.24        | 38.26        | 59.78        | 68.05        |
| UMT-L (InstVL; g) [29]   | Instance | 25.97            | 51.82        | 59.47        | 31.97        | 61.36        | 68.22        | 13.33        | 29.93        | 36.05        | 19.21        | 38.47        | 44.58        |
|                          | Global   | 85.30            | 89.80        | 90.00        | 86.40        | <b>90.40</b> | 90.40        | 72.50        | 82.98        | 84.67        | 74.18        | 84.78        | 86.25        |
| UMT-L (InstVL; g+i) [29] | Instance | 34.68            | 63.99        | 69.28        | 34.99        | 64.97        | 70.81        | 21.13        | 42.28        | 48.05        | 22.82        | 43.03        | 48.42        |
|                          | Global   | 82.40            | 89.50        | 90.10        | 84.30        | 89.90        | 90.50        | 68.16        | 80.47        | 83.02        | 69.76        | 82.84        | 85.25        |
| InstAP (Ours)            | Instance | <b>41.94</b>     | <b>71.40</b> | <b>76.19</b> | <b>42.53</b> | <b>73.40</b> | <b>78.19</b> | <b>28.25</b> | <b>51.80</b> | <b>56.56</b> | <b>31.87</b> | <b>54.14</b> | <b>58.15</b> |
|                          | Global   | <b>88.70</b>     | <b>90.40</b> | 90.50        | <b>88.30</b> | <b>90.40</b> | 90.40        | <b>83.33</b> | <b>87.37</b> | <b>87.95</b> | <b>82.21</b> | <b>88.13</b> | <b>88.68</b> |

**Global Retrieval.** While the baseline establishes a robust standard for global video retrieval, it still exhibits limitations in fine-grained semantic grounding, as shown in Fig. 7. We observe two primary failure modes. First, regarding entity hallucination, the baseline occasionally retrieves captions containing objects absent from the video; for instance, in the last row, it misidentifies rocks in a water filtration clip as “two snakes,” likely misled by textural similarities. Second, regarding identity confusion, the baseline struggles to distinguish specific public figures in news or interview settings (Rows 1 and 2), misidentifying “Donald Trump” or “Bill Murray” as “Chris Christie,” potentially due to overfitting on common newsroom contexts during pre-training. InstAP, leveraging explicit object-level supervision, demonstrates significantly higher fidelity to the actual video content.

## 10. Attention Visualization

To interpret the spatial-temporal reasoning of our model, we visualize the regions driving the cross-modal alignment decisions by analyzing the gradients flowing into the global visual token sequence  $\mathbf{V} \in \mathbb{R}^{L_v \times d}$  (defined in §3.3).

Let  $s \in \mathbb{R}^2$  denote the logits produced by the matching head  $h$ . We identify the features contributing to a successful alignment by backpropagating from the positive match score  $y = s_1$ .

We calculate the importance weight  $\alpha_k \in \mathbb{R}$  for the  $k$ -th feature channel by global average pooling the gradients

over the spatial-temporal sequence:

$$\alpha_k = \frac{1}{L_v} \sum_{l=1}^{L_v} \frac{\partial y}{\partial \mathbf{V}_{l,k}}. \quad (14)$$

These weights quantify the sensitivity of the matching score to specific feature dimensions. The final localization map  $\mathcal{M} \in \mathbb{R}^{L_v}$  is obtained by a weighted combination of the forward activation maps, followed by ReLU rectification to isolate regions with a positive influence:

$$\mathcal{M}_l = \text{ReLU} \left( \sum_{k=1}^d \alpha_k \mathbf{V}_{l,k} \right). \quad (15)$$

The resulting map  $\mathcal{M}$  is reshaped from the flattened sequence to the spatial-temporal grid  $(T, N)$  and upsampled to the input resolution of sampled frames and spatial patches responsible for the prediction. We present additional visualization results in Fig. 8.

## 11. InstVL Dataset Gallery

We present a gallery from InstVL in Fig. 9 and Fig. 10. Each example combines a global scene caption with fine-grained captions attached to individual instances, using consistent IDs and color-coded bounding boxes for videos and object-level bounding boxes for images.

## 12. Ethical Considerations and Data Filtering

InstVL is constructed on top of large-scale web datasets (e.g., LAION [45], COYO [5], HD-VILA [59]), which may

Query Instance

Retrieved Caption R@1

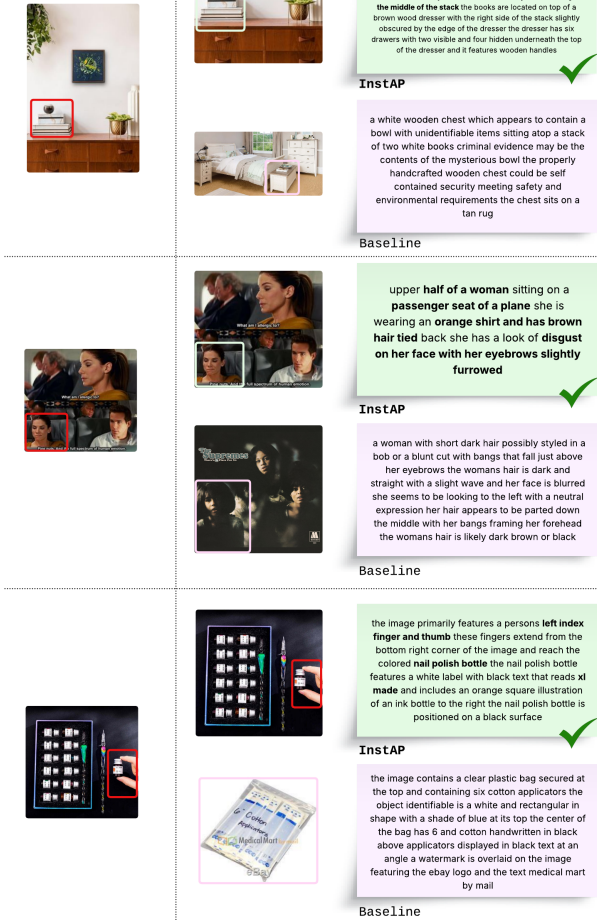

Figure 6. Across a variety of query instances in the InstVL-1K (img-zero), our model InstAP consistently retrieves the correct, fine-grained description, whereas the global-only baseline [29] is easily confounded by semantic distractors, mismatching the query with a different caption.

contain low-quality, NSFW, or otherwise inappropriate content. To mitigate this, we use a data-centric pipeline with automatic filtering for basic image/video quality, NSFW detection, text quality (length, special characters, repetition, flagged terms), and CLIP-based visual-text alignment, discarding samples that fail any of these checks. For recaptioned subsets, we retain only captions with high CLIP alignment to the visual content and remove samples with ambiguous crops or other sensitive entities.

**Human Verification and Limitations.** In early iterations, a team of annotation experts manually inspected random samples and edge cases (e.g., visually complex scenes, ambiguous instance crops), and their feedback was used

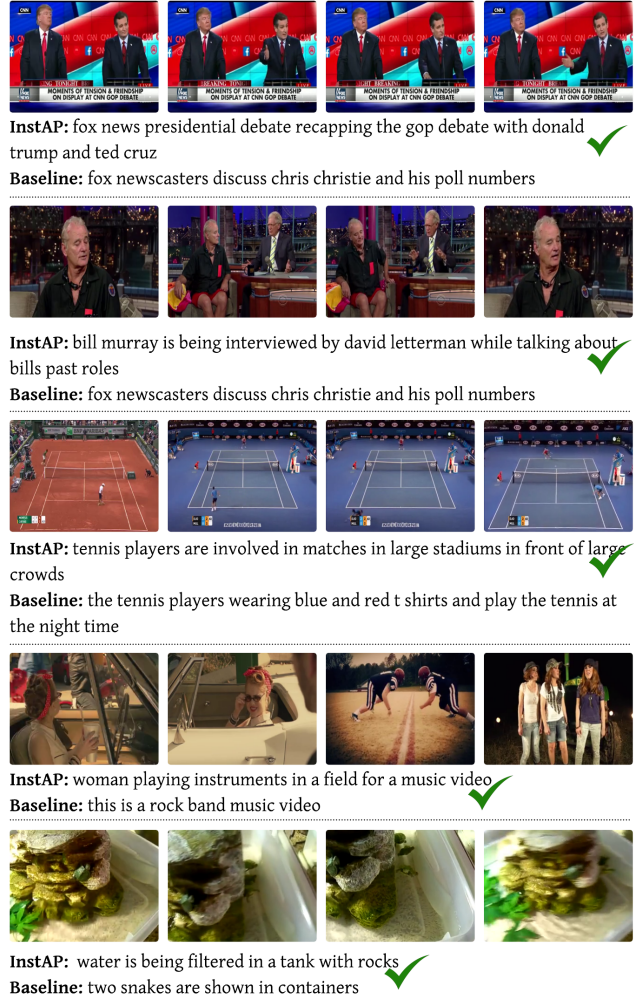

Figure 7. Qualitative comparison on the MSR-VTT [58] video retrieval task. The baseline model frequently exhibits hallucinations (e.g., perceiving ‘snakes’ in a rock tank) or identity confusion (e.g., misidentifying the speakers in news clips). In contrast, InstAP accurately grounds the specific actions, settings, and entities present in the video.

both to refine thresholds and filtering rules and to improve the annotation pipeline (e.g., captioning and bounding-box quality). While these safeguards substantially improve data quality, automatic filters and spot checks remain imperfect. InstVL is therefore intended for research use only, and not for applications such as surveillance, biometric identification, or other high-stakes decision-making.

**Data Release.** To respect copyright and platform terms of service, we do *not* redistribute raw images or videos. We release only InstVL annotations (bounding boxes, instance IDs, captions) together with URLs and metadata (e.g., timestamps, frame indices) needed to retrieve the corresponding segments from the original platforms.

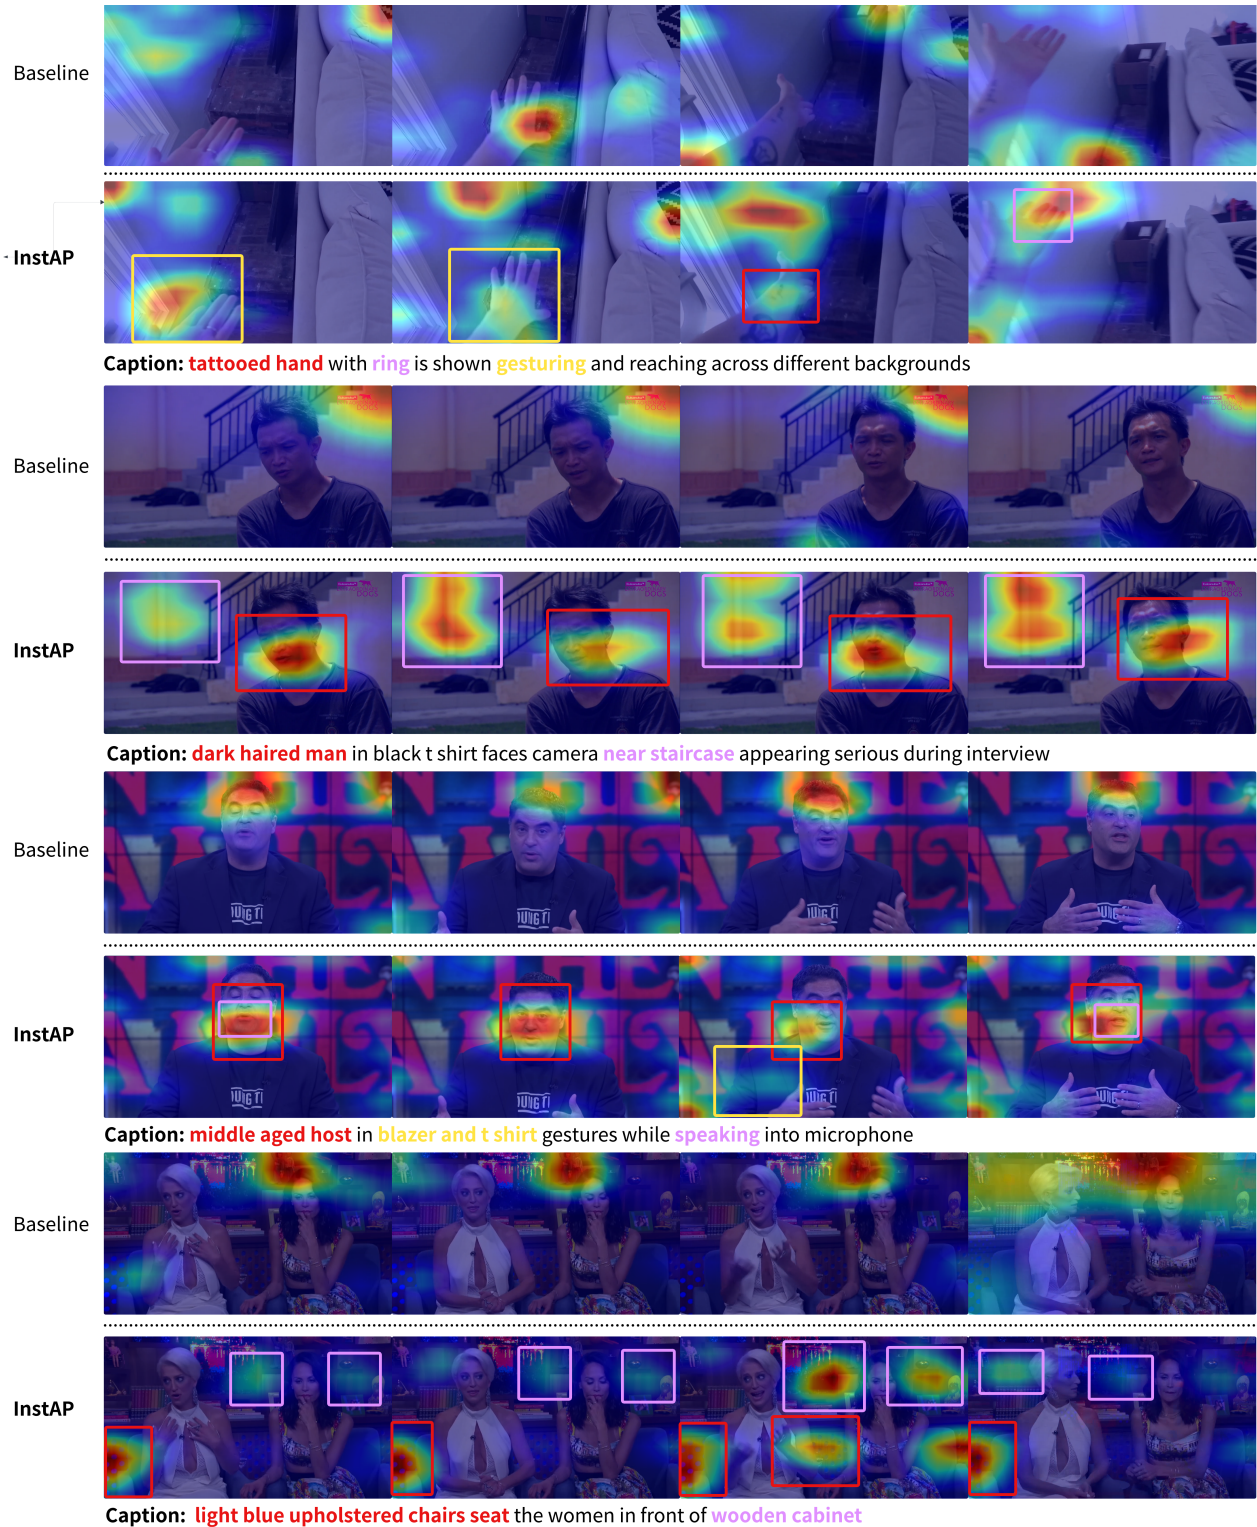

Figure 8. InstAP tends to attend more closely to caption-relevant regions, effectively isolating small, dynamic details (e.g., ‘tattooed hand’), capturing environmental context (e.g., ‘staircase’), and correctly targeting non-salient background objects (e.g., ‘upholstered chairs,’ ‘wooden cabinet’) even in the presence of dominant human faces. In contrast, the global-only baseline [29] exhibits diffuse and often misaligned attention, frequently drifting towards background clutter or generic salient regions rather than the specific entities described in the text.

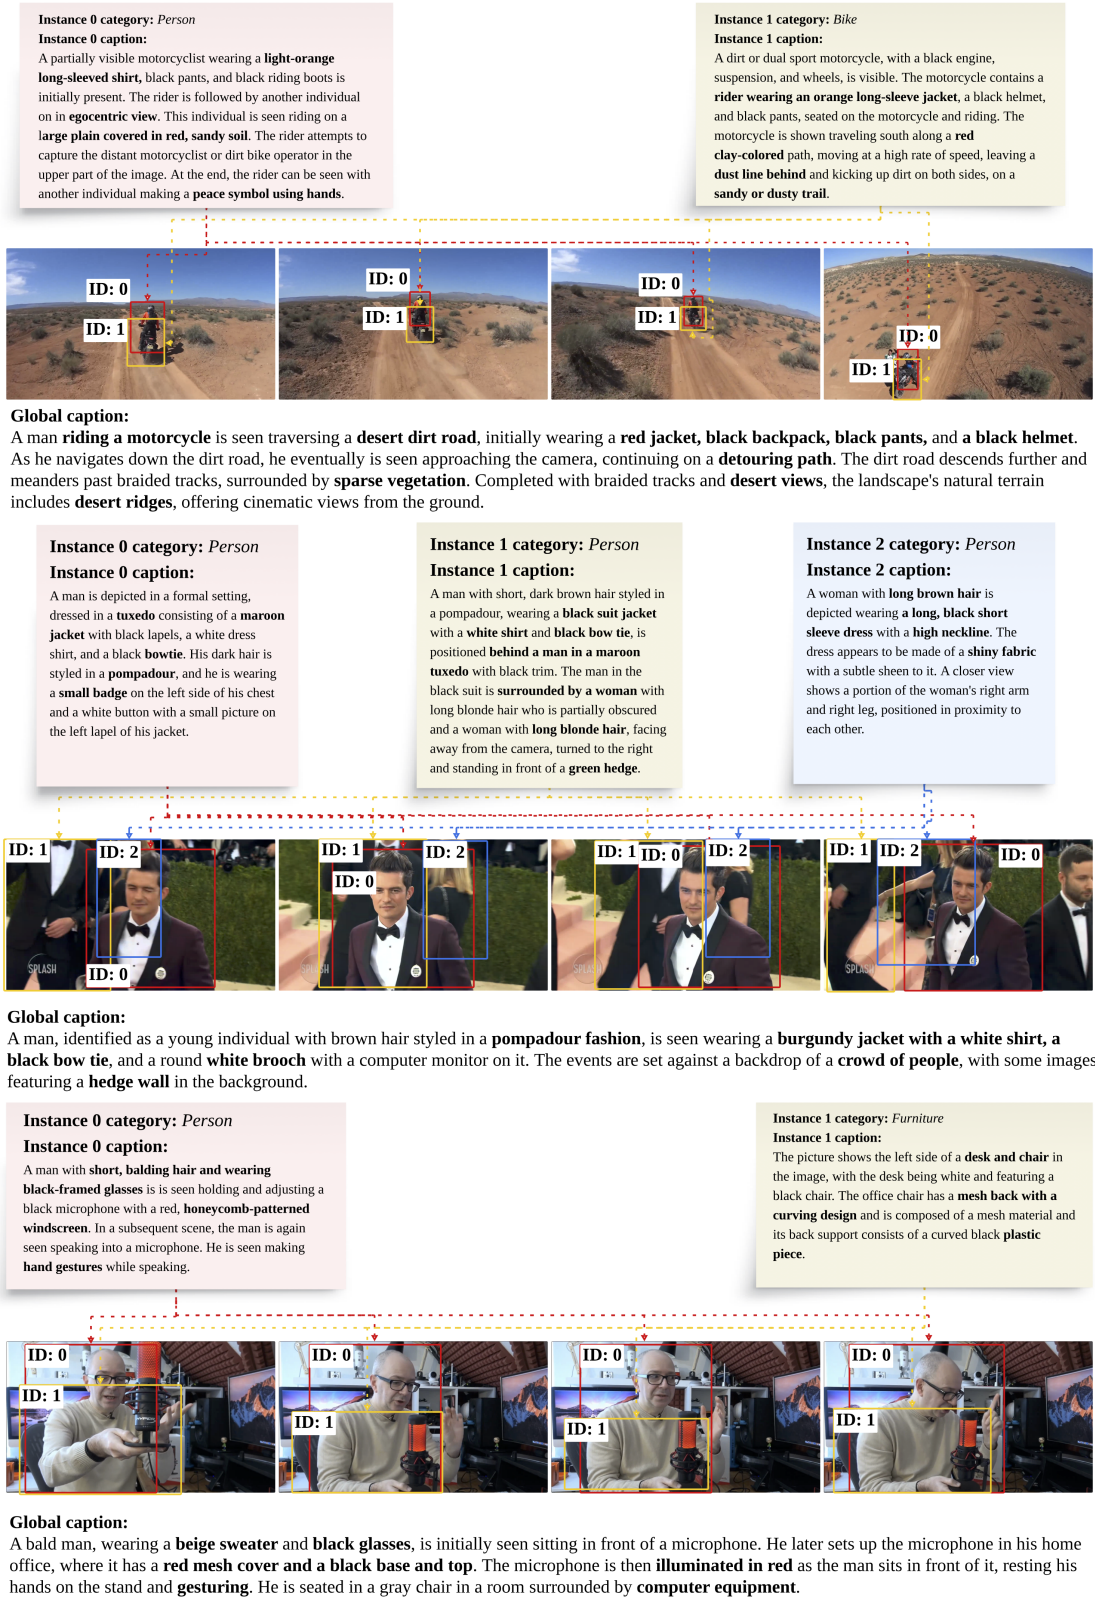

Figure 9. Illustration of annotation for videos in the *InstVL* dataset. For a single video segment, we display sampled frames, each overlaid with color-coded bounding boxes and unique instance IDs that remain consistent across time. The bottom text shows the global caption describing the whole scene together with the fine-grained captions automatically paired to each tracked instance shown on top.

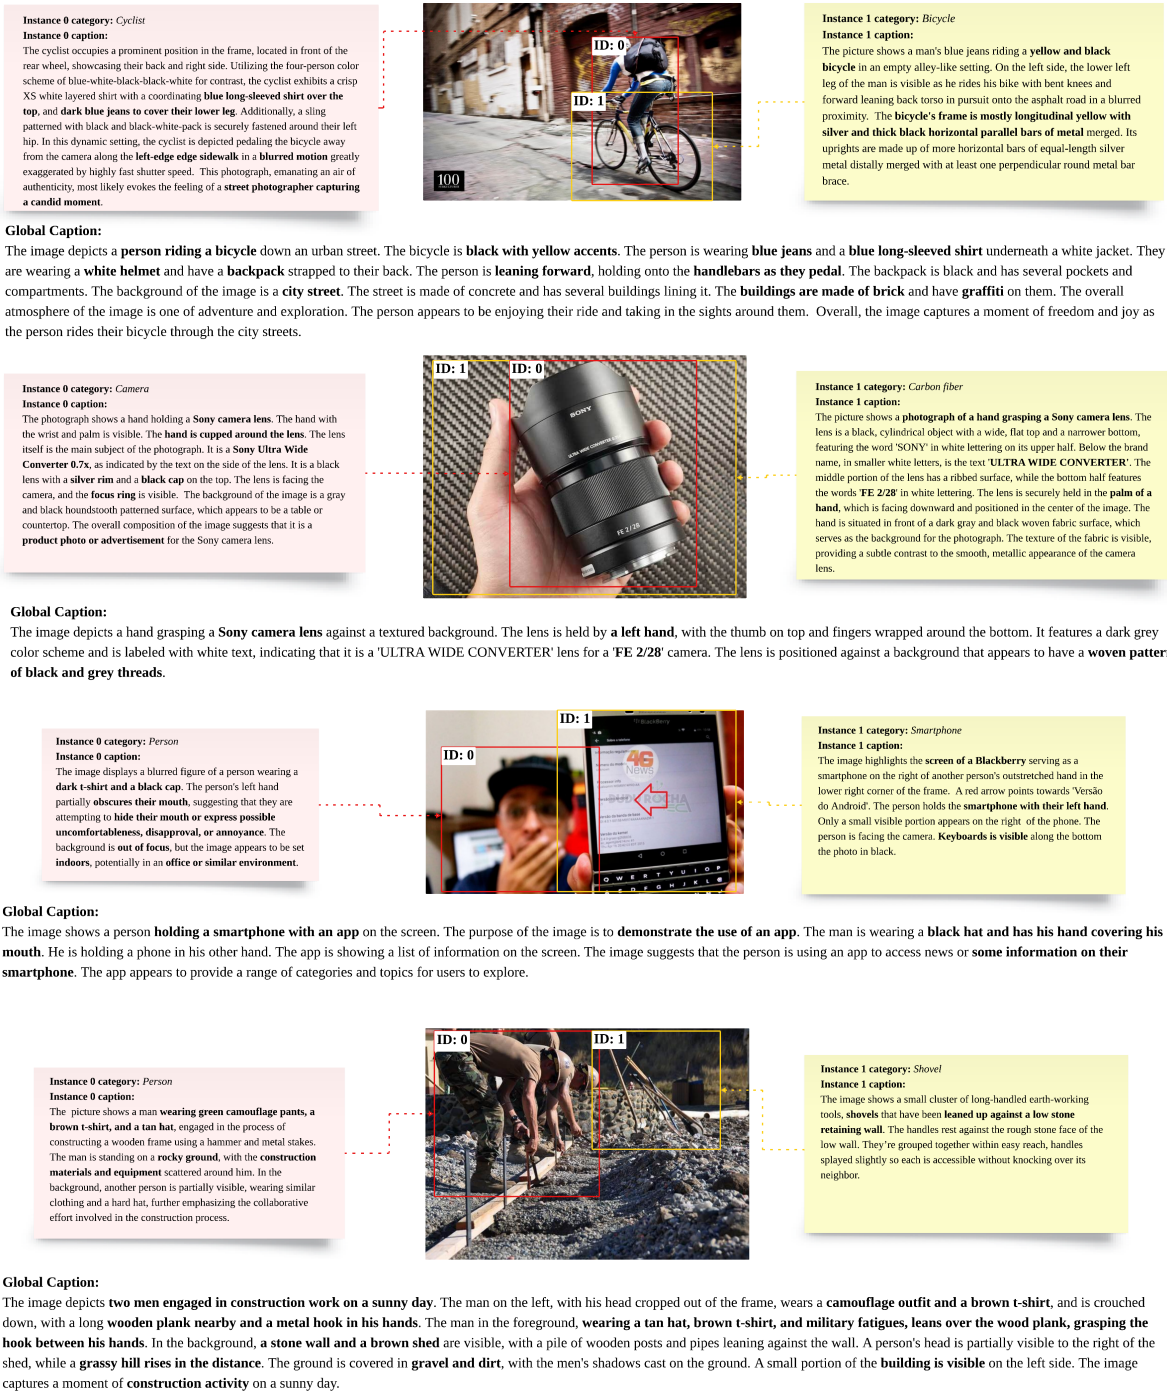

Supplement: Supplementary file 1 [file Kumar_InstAP_Instance-Aware_Vision-Language_CVPR_2026_supplemental.pdf]
